# Supplementary material
Source: Springer Nature journal article supplement (https://www.springermedizin.de/resource/supplementary/12936_2011_1798_MOESM6_ESM.pdf/9541804)

Spikes per 0.5 s

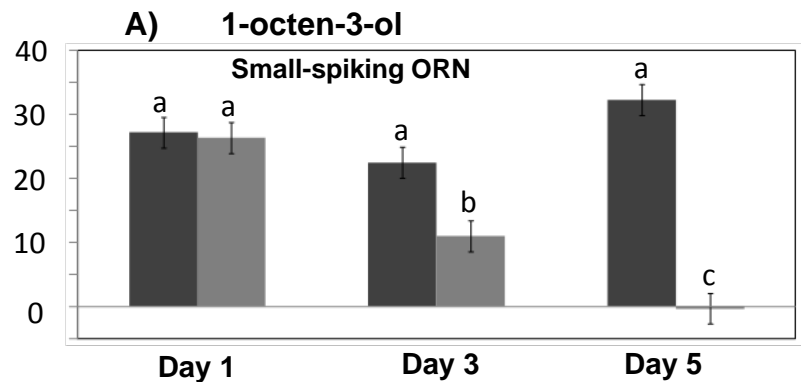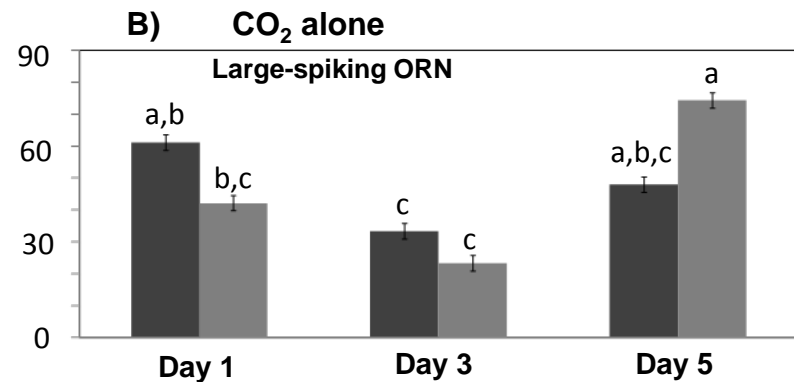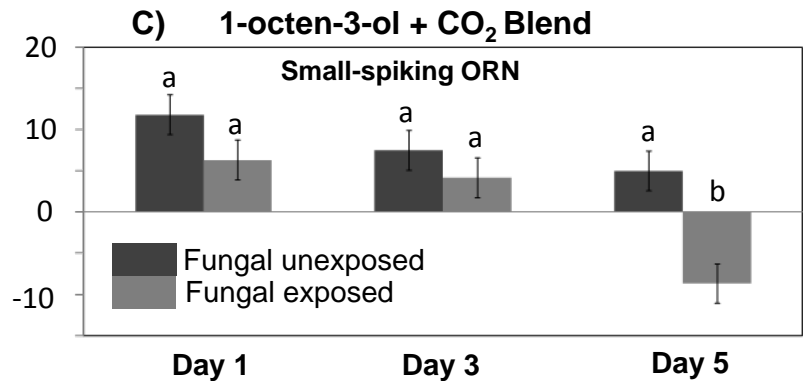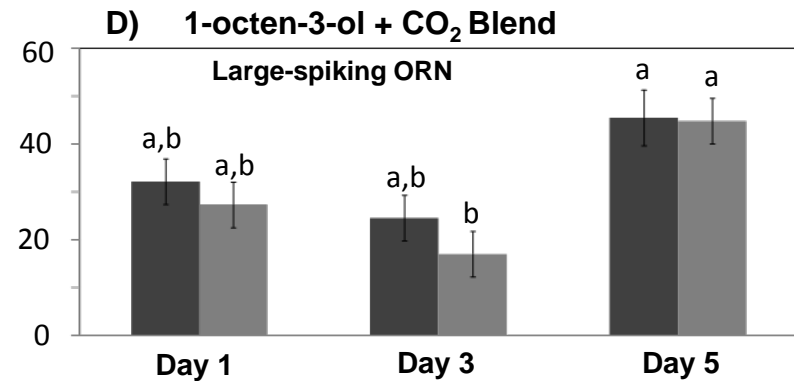

Supplement: MOESM6 [file 9541804]
